# Supplementary material
Source: publisher site journal article supplement (https://www.dovepress.com/article/350935)
Supplement: Supplementary file 1 [file get_supplementary_file.php]

| **Table S1**. Characteristics of men and women participants according to depressive symptoms. | | | | |
| --- | --- | --- | --- | --- |
|  | Depressive symptoms (men) | | Depressive symptoms (women) | |
|  | Yes | No | Yes | No |
| n | 721 | 612 | 229 | 162 |
| Age, years | 44 (36, 54)a | 43 (36, 55) | 39 (34, 48) | 41 (35, 51) |
| BMIb, kg/m2 | 23.4 (21.5, 25.5) | 23.5 (21.6, 25.7) | 20.5 (19.2, 23.1) | 20.7 (19.3, 22.8) |
| Food and nutrition intake |  |  |  |  |
| Total energy intake, kcal/day | 1845.4 (1487.4, 2268.3) | 1907.3 (1587.2, 2282.6) | 1527.3 (1185.7, 1860.5) | 1512.6 (1212.2, 1886.7) |
| Milk consumption, g/day | 44.6 (0.0, 146.5) | 55.3 (11.6, 163.3) | 53.6 (10.0, 135.0) | 96.4 (48.2, 150.0) |
| Soy consumption, g/day | 47.5 (23.2, 81.7) | 52.5 (28.3, 88.1) | 45.5 (18.4, 77.1) | 45.5 (30.0, 79.9) |
| Seaweed consumption, g/day | 6.2 (2.9, 14.0) | 9.0 (5.1, 15.4) | 5.4 (2.5, 14.8) | 9.9 (2.5, 13.6) |
| Green tea consumption, g/day | 122.1 (61.0, 427.2) | 123.7 (61.0, 427.2) | 150.0 (21.4, 375.0) | 150.0 (53.6, 375.0) |
| hsCRP, mg/L | 0.33 (0.19, 0.73) | 0.39 (0.19, 0.88) | 0.20 (0.09, 0.46) | 0.16 (0.09, 0.36) |
| Hypertension, n (%) | 237 (33.0) | 181 (30.0) | 21 (9.2) | 21 (13.2) |
| Diabetes, n (%) | 64 (8.9) | 35 (5.8) | 3 (1.3) | 4 (2.5) |
| Hyperlipemia, n (%) | 369 (51.3) | 310 (51.3) | 63 (27.5) | 45 (28.3) |
| Smoking status, n (%) |  |  |  |  |
| Nonsmoker | 414 (57.4) | 294 (48.0) | 63 (27.5) | 20 (12.3) |
| Former smoker | 81 (11.2) | 97 (15.8) | 16 (7.0) | 16 (9.9) |
| Smoker | 226 (31.3) | 221 (36.1) | 150 (65.5) | 126 (77.8) |
| Drinking status, n (%) |  |  |  |  |
| Nondrinker | 135 (18.7) | 89 (14.5) | 103 (45) | 60 (37.0) |
| 1-6 days/week | 356 (49.4) | 342 (55.9) | 106 (46.3) | 86 (53.1) |
| Everyday | 230 (31.9) | 181 (29.6) | 20 (8.7) | 16 (9.9) |
| Living along, n (%) | 101 (14.0) | 78 (12.9) | 36 (15.7) | 28 (17.6) |
| Education level ≥ 12y, n (%) | 237 (33.0) | 260 (43.0) | 23 (10.0) | 21 (13.2) |
| Desk work, n (%) | 410 (57.0) | 335 (55.5) | 53 (23.1) | 33 (20.8) |
| PA ≥ 23METs hour/week, n (%) | 243 (33.8) | 210 (34.8) | 54 (23.6) | 39 (24.5) |
| a Values are expressed as median (interquartil range, IQR) for continuous variables or n (%) for categorical variables, respectively.  b BMI, body mass index; hsCRP, high sensitive C-reactive protein; PA, physical activity. | | | | |
